# Supplementary material for: Procyanidin B2 3″-O-gallate Isolated from Reynoutria elliptica Prevents Glutamate-Induced HT22 Cell Death by Blocking the Accumulation of Intracellular Reactive Oxygen Species
Source: PubMed Central journal article supplement (PMC6769555; doi:10.3390/biom9090412), 2019-08-26
Supplement: biomolecules-09-00412-s001.pdf [file biomolecules-09-00412-s001.pdf]

Communication

# Procyanidin B2 3''-O-gallate Isolated from *Reynoutria elliptica* Prevents Glutamate-Induced HT22 Cell Death by Blocking the Accumulation of Intracellular Reactive Oxygen Species

Ji Hoon Song<sup>1,†</sup>, Sil Kim<sup>2,†</sup>, Jae Sik Yu<sup>2</sup>, Do Hwi Park<sup>3</sup>, Song-Yi Kim<sup>4</sup>, Ki Sung Kang<sup>3</sup>, Sullim Lee<sup>5,\*</sup> and Ki Hyun Kim<sup>2,\*</sup>

<sup>1</sup> Jeju Institute of Korean Medicine, Jeju 63309, Republic of Korea

<sup>2</sup> School of Pharmacy, Sungkyunkwan University, Suwon 16419, Republic of Korea

<sup>3</sup> College of Korean Medicine, Gachon University, Seongnam 13120, Republic of Korea

<sup>4</sup> Department of Anatomy and Acupoint, College of Korean Medicine, Gachon University, Seongnam 13120, Republic of Korea

<sup>5</sup> Department of Life Science, College of Bio-Nano Technology, Gachon University, Seongnam, 13120, Republic of Korea

\* Correspondence: sullimlee@gachon.ac.kr; Tel.: +82-31-750-8573 (S.L.) and khkim83@skku.edu; Tel.: +82-31-290-7700 (K.H.K.)

† These authors contributed equally to this work.

Received: 10 July 2019; Accepted: 24 August 2019; Published: date

## Supplementary Materials

### Materials and Methods

#### General Experimental Procedures

A JASCO P-1020 polarimeter (JASCO, Easton, MD, USA) was utilized to record optical rotation data. UV spectra were acquired on an Agilent 8453 UV-visible spectrophotometer (Agilent Technologies, Santa Clara, CA, USA). The NMR studies were performed using a Bruker AVANCE III 850 NMR spectrometer operating at 850 MHz (<sup>1</sup>H) and 212.5 MHz (<sup>13</sup>C). Preparative high-performance liquid chromatography (HPLC) was performed with a Waters 1525 binary HPLC pump equipped with a Waters 996 photodiode array detector (Waters Corporation, Milford, CT, USA) and column temperature was maintained at 30 °C. Semi-preparative HPLC was conducted with a Shimadzu Prominence HPLC system with SPD-20A/20AV Series Prominence HPLC UV-Vis detectors (Shimadzu, Tokyo, Japan) and column temperature was maintained at 30 °C. LC/MS analysis was performed on an Agilent 1200 Series HPLC system (Agilent Technologies, Santa Clara, CA, USA) equipped with a diode array detector and a 6130 Series ESI mass spectrometer with an analytical Kinetex (4.6 × 100 mm, 3.5 μm) HPLC column. The mobile phase consisted of H<sub>2</sub>O (A) and MeOH (B) with a gradient system as follows: 10–100% B (0–30 min); 100 % B (30–40 min); 100-10% B (40–41 min); 10% B (41–50 min). The flow rate of the mobile phase was 0.3 mL/min, and the column temperature was maintained at 40 °C. A 5 μL aliquot from 100 μL of samples (0.01 mg/μL) was used in the positive-mode ESIMS at *m/z* 100-1000 Da range with acquisition times of 0.2 s in the centroid mode. The ESI conditions were set as follows: capillary voltage 2.0 kV, convoltage 50 V, source temperature 120 °C, desolvation temperature 350 °C, and desolvation gas flow 800 L/h. High purity nitrogen gas was used as the nebulizer and auxiliary gas. The collision energy for the detection of the precursor ions was set to 3 eV. RP-C<sub>18</sub> silica gel (Merck, 40–63 μm) was used for column chromatography. Precoated silica gel F<sub>254</sub> plates and RP-18 F<sub>254s</sub> plates (Merck, Darmstadt, Germany)

were used for thin-layer chromatography (TLC). Spots on TLC were detected under UV light or by heating after spraying with anisaldehyde-sulfuric acid.

#### *Extraction and Isolation*

Dried seeds of *R. elliptica* (110 g) were extracted three times with 99.9% MeOH (200 mL × 3 days) at room temperature and then the extracts were filtered through Whatman filter paper no. 2 (pore size: 8 μm). The filtrates were combined and concentrated *in vacuo*, thus yielding crude MeOH extract (8.3 g). A stock solution of the MeOH extract was prepared at 25 mg/mL in DMSO and evaluated for its neuroprotective activity on glutamate-induced excitotoxicity in HT22 cells. The MeOH extract was dissolved in sterile distilled water, and a small aliquot of the MeOH extract was sequentially injected into the LC/MS and eluted with a gradient solvent system of MeOH–H<sub>2</sub>O (1:9–9:1, flow rate: 0.3 mL/min, UV 254 nm), which revealed the presence of procyanidin dimer gallate with a molecular ion peak at  $m/z$  731 [M + H]<sup>+</sup> in positive ESI mode by comparison with our house-built UV library in LC/MS. The MeOH extract (8.0 g) was separated by preparative reverse-phase HPLC using an Agilent Eclipse C18 column (21.2 × 250 mm; flow rate: 5 mL/min) with MeOH–water (1:9–9:1, gradient system) to yield five fractions (F1–F5). All the fractions were subjected to LC/MS and eluted with a gradient solvent system of MeOH–H<sub>2</sub>O (1:9–9:1, flow rate: 0.3 mL/min, UV 254 nm) to identify the target constituent, procyanidin dimer gallate. Based on the LC/MS data, one major peak of procyanidin dimer gallate was detected in the F2 fraction. The F2 fraction (0.9 g) was further separated by reverse-phase semi-preparative HPLC on a Phenomenex Luna column (C18, 250 × 10.0 mm, 5 μm, flow rate: 2 mL min<sup>-1</sup>) with 50% MeOH, thereby generating procyanidin B2 3''-O-gallate (**1**) (23.0 mg). Compound **1** was dissolved in DMSO at a concentration of 50 mM and their protective effect and underlying protective mechanism examined against glutamate-induced HT22 cell death. The purity of compound **1** used for the biological studies was determined to be >95% by LC/MS analysis.

#### *Procyanidin B2 3''-O-gallate (1)*

Red and violet solid;  $[\alpha]_{\text{D}}^{25}$  -42.0 (Me<sub>2</sub>CO); UV (MeOH)  $\lambda_{\text{max}}$  205, 215, 280 nm; <sup>1</sup>H (850 MHz) and <sup>13</sup>C NMR (212.5 MHz), see Table 1; ESI-MS ( $m/z$ ) 731 [M + H]<sup>+</sup>.

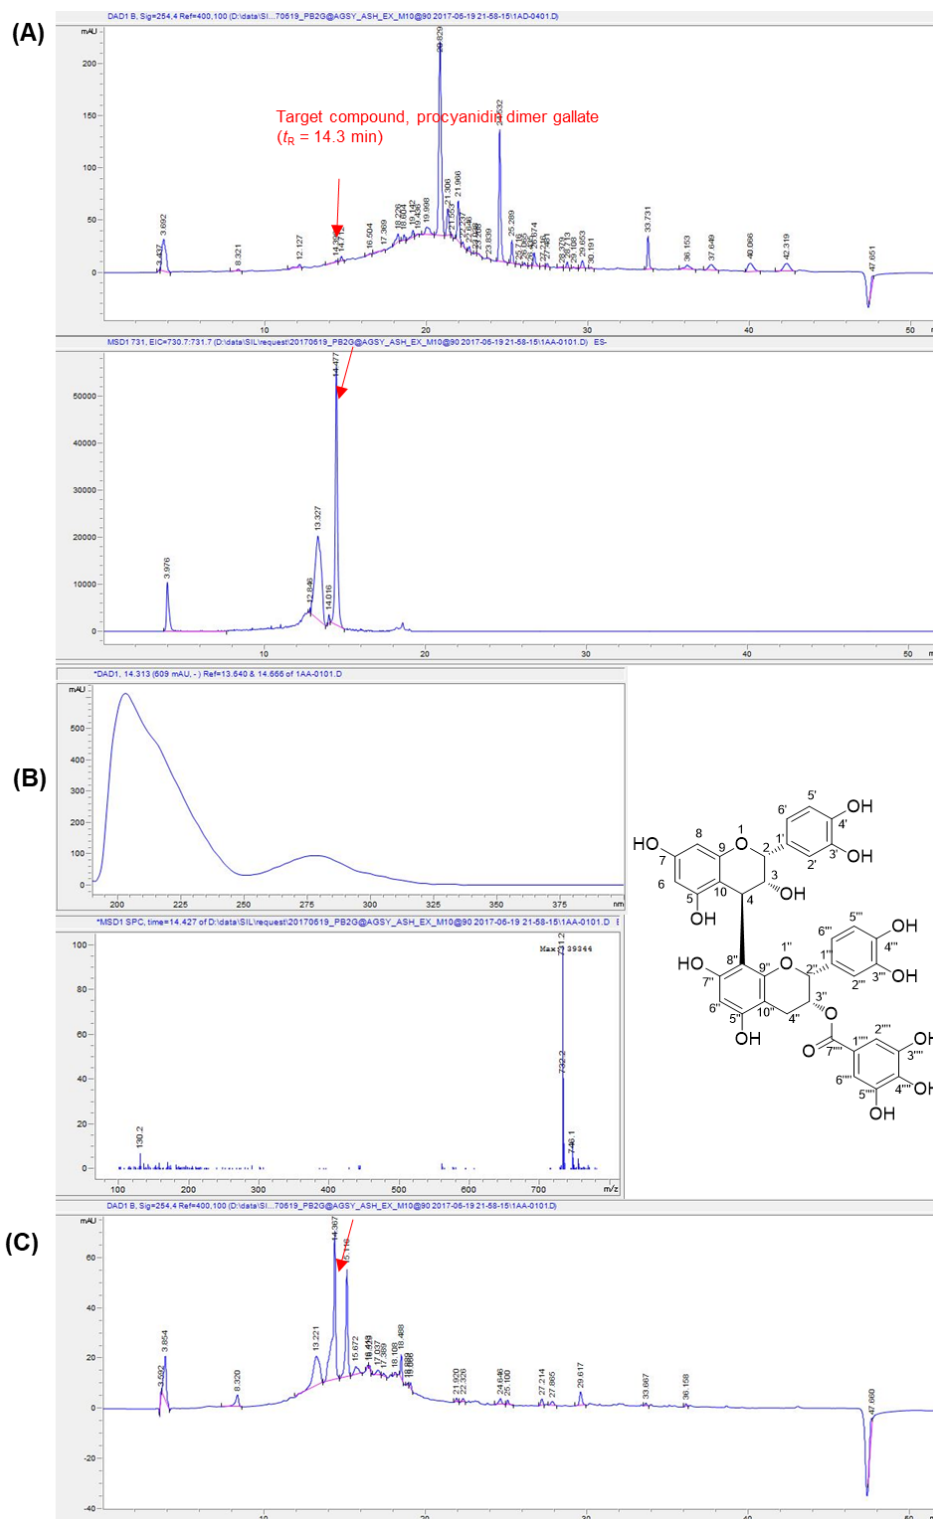

**Figure S1.** (A) UV chromatogram of LC/MS analysis of the MeOH extract (detection wavelength was set at 254 nm) and extracted ion chromatogram (EIC) for  $m/z$  731  $[M + H]^+$  in positive ESI mode. (B) UV spectrum of the peak at retention time 14.3 min, positive ion-mode ESI-MS data of the peak, and the chemical structure of procyanidin B2 3''-O-gallate. (C) UV chromatogram of LC/MS analysis of the F2 fraction (detection wavelength was set at 254 nm), which indicated the presence of the peak of procyanidin dimer gallate.

**Table S1.** <sup>1</sup>H and <sup>13</sup>C NMR data of compound **1** and the reported value of **1**.<sup>a</sup>

| Position | <b>1</b> <sup>b</sup>          |                                       | <b>1</b> (reported one) <sup>c</sup> [1] |                                       |
|----------|--------------------------------|---------------------------------------|------------------------------------------|---------------------------------------|
|          | $\delta_{\text{C}}^{\text{b}}$ | $\delta_{\text{H}}$ (J in Hz)         | $\delta_{\text{C}}^{\text{b}}$           | $\delta_{\text{H}}$ (J in Hz)         |
| 2        | 75.9 d                         | 5.34 br s                             | 75.8 d                                   | 5.31 br s                             |
| 3        | 71.1 d                         | 4.05 br s                             | 71.7 d                                   | 4.00 br s                             |
| 4        | 35.4 d                         | 4.25 br s                             | 36.0 d                                   | 4.45 br s                             |
| 5        | 154.9 s                        |                                       | 154.3 s                                  |                                       |
| 6        | 95.3 d                         | 5.65 d (2.0)                          | 95.4 d                                   | 5.79 d (2.0)                          |
| 7        | 154.0 s                        |                                       | 153.4 s                                  |                                       |
| 8        | 95.3 d                         | 5.55 d (2.0)                          | 95.4 d                                   | 5.54 d (2.0)                          |
| 9        | 155.1 s                        |                                       | 155.5 s                                  |                                       |
| 10       | 106.6 s                        |                                       | 103.3 s                                  |                                       |
| 1'       | 130.2 s                        |                                       | 131.2 s                                  |                                       |
| 2'       | 113.7 d                        | 7.08 d (2.0)                          | 114.7 d                                  | 6.96 d (2.0)                          |
| 3'       | 144.6 s                        |                                       | 143.6 s                                  |                                       |
| 4'       | 144.8 s                        |                                       | 144.1 s                                  |                                       |
| 5'       | 117.9 d                        | 6.84 d (8.0)                          | 116.1 d                                  | 6.81 d (8.0)                          |
| 6'       | 119.2 d                        | 7.05 dd (2.0, 8.0)                    | 119.5 d                                  | 6.72 dd (2.0, 8.0)                    |
| 2''      | 78.1 d                         | 4.67 br s                             | 77.7 d                                   | 4.47 br s                             |
| 3''      | 68.8 d                         | 5.21 d (5.0)                          | 69.6 d                                   | 5.25 d (4.5)                          |
| 4''      | 26.5 t                         | 2.88 d (17.0);<br>3.05 dd (5.0, 17.0) | 26.2 t                                   | 2.87 d (16.0);<br>2.96 dd (4.5, 16.0) |
| 5''      | 154.9 s                        |                                       | 154.4 s                                  |                                       |
| 6''      | 95.3 d                         | 6.14 s                                | 96.1 d                                   | 6.23 s                                |
| 7''      | 154.3 s                        |                                       | 153.8 s                                  |                                       |
| 8''      | 108.7 s                        |                                       | 108.2 s                                  |                                       |
| 9''      | 154.9 s                        |                                       | 154.9 s                                  |                                       |
| 10''     | 98.5 s                         |                                       | 99.8 s                                   |                                       |
| 1'''     | 129.3 s                        |                                       | 130.1 s                                  |                                       |
| 2'''     | 114.6 d                        | 6.68 d (2.0)                          | 115.0 d                                  | 6.63 d (2.0)                          |
| 3'''     | 144.5 s                        |                                       | 143.2 s                                  |                                       |
| 4'''     | 144.8 s                        |                                       | 143.9 s                                  |                                       |
| 5'''     | 114.7 d                        | 6.74 d (8.0)                          | 115.5 d                                  | 6.69 d (8.0)                          |
| 6'''     | 120.3 d                        | 6.71 dd (2.0, 8.0)                    | 119.7 d                                  | 6.46 dd (2.0, 8.0)                    |
| 1''''    | 138.4 s                        |                                       | 138.2 s                                  |                                       |
| 2''''    | 108.9 d                        | 6.94 s                                | 109.8 d                                  | 6.87 s                                |
| 3''''    | 145.0 s                        |                                       | 144.7 s                                  |                                       |
| 4''''    | 145.1 s                        |                                       | 144.7 s                                  |                                       |
| 5''''    | 145.0 s                        |                                       | 144.7 s                                  |                                       |
| 6''''    | 108.9 d                        | 6.94 s                                | 109.8 d                                  | 6.87 s                                |
| 7''''    | 166.3 s                        |                                       | 167.5 s                                  |                                       |

<sup>a</sup> Coupling constants (in parentheses) are in Hz. <sup>b</sup> NMR data were measured at 850 MHz (<sup>1</sup>H) and 212.5 MHz (<sup>13</sup>C) in 10% DMSO in CD<sub>3</sub>OD. <sup>c</sup> NMR data were measured at 400 MHz (<sup>1</sup>H) and 100 MHz (<sup>13</sup>C) in 10% D<sub>2</sub>O in H<sub>2</sub>O. Ref. [1] Tarascou, I.; Barathieu, K.; Simon, C.; Ducasse, M.A.; Andre, Y.; Fouquet, E.; Dufourc, E.J.; de Freitas, V.; Lqguerre, M.; Pianet, I. A 3D structural and conformational study of procyanidin dimers in water and hydro-alcoholic media as viewed by NMR and molecular modeling. *Magn. Reson. Chem.* **2006**, *44*, 868-880.

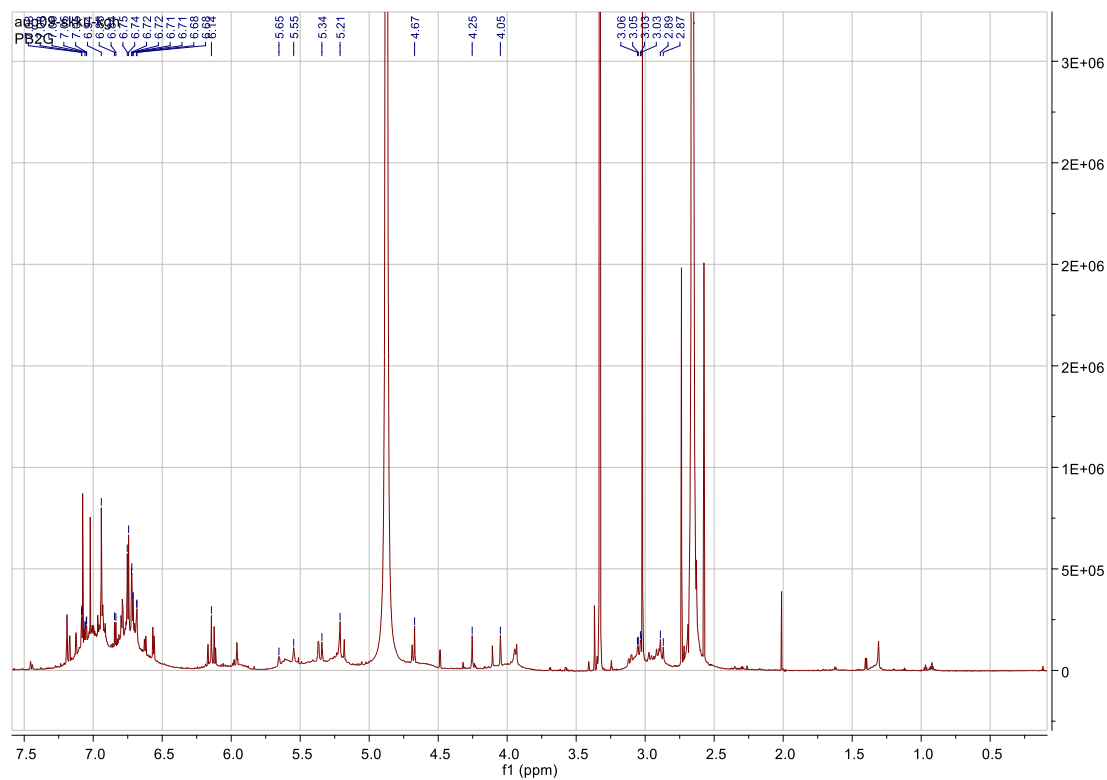

**Figure 2.** The <sup>1</sup>H NMR spectrum of **1** (850 MHz).

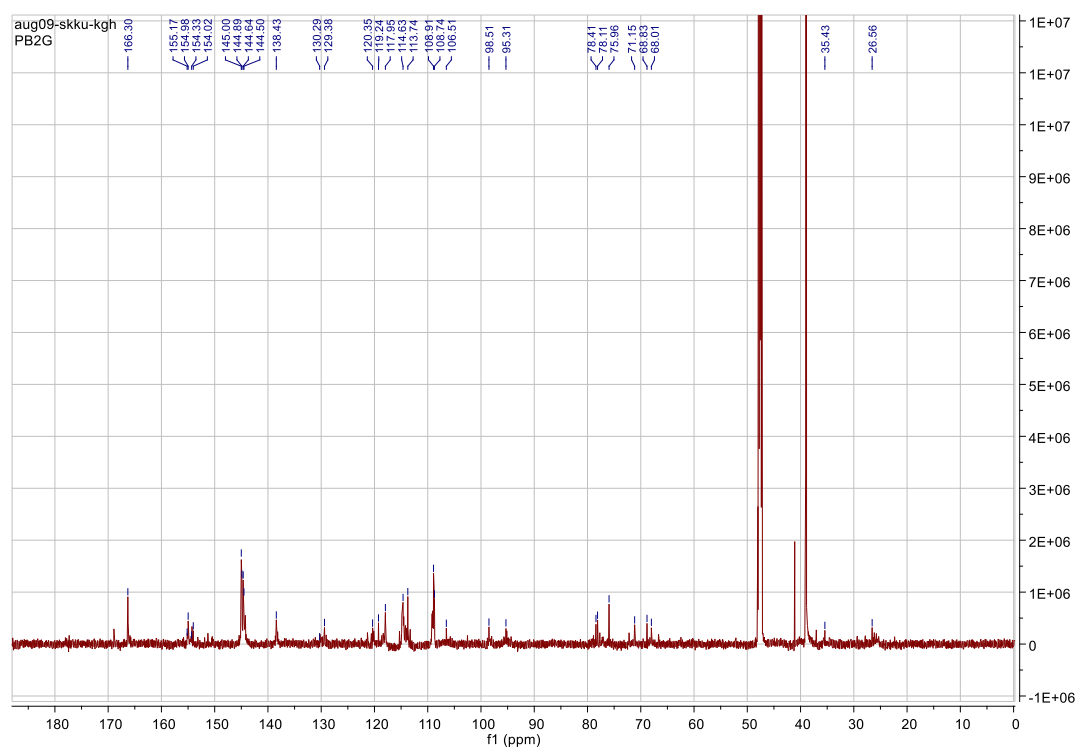

**Figure 3.** The <sup>13</sup>C NMR spectrum of **1** (212.5 MHz).

#### Quantitative Analysis of Procyanidin B2 3''-O-gallate

The detection of **1** was analyzed using an LC-MS, Agilent 1200 Series analytical system equipped with a photodiode array detector combined with a 6130 Series ESI mass spectrometer. Calibration curves and linear regression equations were generated for the external standard, compound **1**. Compound **1** (1.0 mg) was dissolved in MeOH (1.0 mL), and the standard stock solution was further diluted with MeOH to provide solutions of 0.6, 1.5, 2.0, 3.0, and 5.0 µg/mL. The crude MeOH extract (1.0 mg) of *R. elliptica* seeds was dissolved in MeOH (1.0 mL), generating the sample stock solution, which was further diluted with MeOH to provide a solution of 100 µg/mL. Each solution was filtered through a 0.45 mm hydrophobic polytetrafluoroethylene filter and finally analyzed by LC/MS using a Kinetex C18 column (2.1 × 100 mm, 5 µm; Phenomenex, Torrance, CA, USA) set at 25 °C. The mobile phase consisting of formic acid in water [0.1% (v/v)] (A) and methanol (B) was delivered at a flow rate of 0.3 mL/min by applying the following programmed gradient elution: 10%–90% (B) for 30 min, 100% (B) for 1 min, 100% (B) isocratic for 10 min, and 10% (B) isocratic for 10 min, to perform post-run reconditioning of the column. The injection volume was 15 µL. The quantification of **1** was based on the peak area obtained from the MS detection and calculated as equivalents of the standard. Content was expressed as micrograms per 1 mg of extract weight.

#### Cell Culture

For demonstrating the neuroprotective activity of MeOH extracts and compound **1**, the immortalized murine hippocampal HT22 cell line was grown on Dulbecco's Modified Eagle's medium (Corning, Manassas, VA, USA) supplemented with 10% fetal bovine serum and penicillin/streptomycin (Grand Island, NY, USA). The tissue culture plates were obtained from Falcon (BD Biosciences, Franklin Lakes, NJ, USA). Glutamate was obtained from Sigma-Aldrich (St. Louis, MO, USA). All other chemicals were of reagent grade.

#### Determination of Cell Viability

Cell viability was determined using a cell viability assay kit (EZ-CyTox; Daeil Lab Service, Seoul, Korea) according to the manufacturer's instructions. In brief, HT22 cells were plated onto 96-well plates at a density of  $1 \times 10^4$  cells/well and allowed to attach for 24 h. Cells were then treated with 5 mM glutamate in the presence or absence of MeOH extracts or compound **1**. After exposure to glutamate for 24 h, the cells were incubated for an additional 30 min with 10  $\mu$ L of EZ-CyTox reagent. The absorbance was measured at 450 nm using an E-Max microplate reader (Molecular Devices, Sunnyvale, CA). The results are represented as the percentage of cell viability compared to the control cells.

#### *Intracellular ROS Assay*

The levels of intracellular ROS were determined using 2',7'-dichlorofluorescein diacetate (DCFDA; Sigma-Aldrich). HT22 cells were plated on black 96-well plates at a density of  $1 \times 10^4$  cells per well. After exposure to 5 mM glutamate for 8 h, the cells were loaded with 10  $\mu$ M DCFDA and incubated for 30 min. After washing cells thrice with phosphate buffered saline, the fluorescence intensity of DCFDA was measured using a fluorescent microplate reader (SPARK 10M; Tecan, Männedorf, Switzerland) at excitation and emission wavelengths of 495 and 517 nm, respectively. In addition, representative fluorescent images were obtained using a fluorescence microscope (IX50; Olympus, Tokyo, Japan) equipped with a charge-coupled device (CCD) camera.

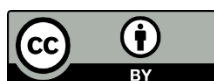

© 2019 by the authors. Licensee MDPI, Basel, Switzerland. This article is an open access article distributed under the terms and conditions of the Creative Commons Attribution (CC BY) license (<http://creativecommons.org/licenses/by/4.0/>).
